# Supplementary material for: Hafnium vs. Zirconium, the Perpetual Battle for Supremacy in Catalytic Olefin Polymerization: A Simple Matter of Electrophilicity?
Source: Polymers (Basel). 2021 Aug 6;13(16):2621. doi: 10.3390/polym13162621 (PMC8400551; doi:10.3390/polym13162621)
Supplement: Supplementary file 1 [file polymers-13-02621-s001.zip › results.xyz]

85
 Hf_PP_RS_CMe3+
C     2.5319408    0.2035928    0.1735369
C     1.8947514    1.3432101    0.7925268
H     2.5866939   -0.4327909   -1.9735205
C     1.3585341    2.2058161   -0.2467505
C     1.6026328    1.5156480   -1.4828367
C     2.2436034    0.2764856   -1.2182790
C    -1.6459708    1.5565371    1.5467887
C    -2.3147447    0.3580784    1.1915102
C    -2.5898558    0.3946944   -0.2128490
C    -1.9161929    1.5612226   -0.7381936
C    -1.3348519    2.3095408    0.3657135
C     3.3519490   -0.6894304    0.9462969
C     3.1626520   -0.6653032    2.3160247
H     2.1203541    0.2104544    4.0064717
C     2.2648630    0.2506553    2.9252039
H     1.1343555    2.0620430    2.7300406
C     1.6761905    1.2795518    2.2049302
H    -1.3220494    2.5727721   -2.5909646
C    -1.8456132    1.7254141   -2.1550102
H    -2.5124402    0.9879314   -4.0514904
C    -2.5310953    0.8434746   -2.9700209
C    -3.3271741   -0.1953442   -2.4260646
C    -3.3921878   -0.4387452   -1.0622821
H    -2.6941414   -0.3789405    1.8967875
Si    0.0738018    3.5498808    0.1165323
C    -0.2311727    4.7918392   -1.2485453
H     0.7259948    5.2654430   -1.5223300
H    -0.8789609    5.5809967   -0.8321918
H    -0.7098495    4.4296778   -2.1663128
C     0.5279435    4.5929353    1.6012628
H     0.9882266    4.0722958    2.4501588
H    -0.3634506    5.1311424    1.9628579
H     1.2498241    5.3510946    1.2551617
Hf   -0.0472010    0.2673694    0.0391755
C    -0.4197966   -1.8447259   -1.2712890
H    -0.6019072   -0.7941450   -1.7022905
C    -0.0970008   -1.9631555    0.2382185
C     1.3698885    2.0225025   -2.8789533
H     0.8232871    1.2963942   -3.4991728
H     0.8287284    2.9752456   -2.8881777
H     2.3433675    2.1968843   -3.3620589
C    -1.4419286    1.9677687    2.9776059
H    -0.8207924    2.8657528    3.0723162
H    -2.4241276    2.2075808    3.4128346
H    -1.0068192    1.1589957    3.5828676
H    -3.9385954   -0.8044177   -3.0957443
H     3.7483394   -1.3373620    2.9469767
C     4.3808827   -1.5539513    0.3131563
C     4.4728074   -2.9044832    0.6987802
C     5.3213832   -1.0273774   -0.6037796
C     5.4360223   -3.7496945    0.1573136
H     3.7572088   -3.2953798    1.4255573
C     6.2832895   -1.8986261   -1.1356725
C     6.3408058   -3.2440184   -0.7784315
H     5.4801381   -4.7956093    0.4644930
H     7.0220794   -1.4947191   -1.8326259
H     7.1042366   -3.8910745   -1.2138367
C    -4.2739460   -1.5059833   -0.5207792
C    -4.1864740   -2.7957150   -1.0779023
C    -5.2154404   -1.2518043    0.5013911
C    -4.9629480   -3.8464293   -0.5996752
H    -3.4811578   -2.9733561   -1.8948444
C    -5.9883716   -2.3258033    0.9677822
C    -5.8609431   -3.6103864    0.4439257
H    -4.8698378   -4.8408038   -1.0387247
H    -6.7278295   -2.1343675    1.7497250
H    -6.4787180   -4.4212419    0.8336510
C    -5.4868816    0.1268809    1.0529336
H    -4.9695099    0.3012071    2.0099205
H    -5.1776225    0.9207502    0.3591236
H    -6.5623358    0.2459968    1.2454218
C     5.3976986    0.4347047   -0.9729671
H     4.8016667    0.6707837   -1.8695012
H     5.0422417    1.0872244   -0.1627113
H     6.4376529    0.7085229   -1.1977830
H    -1.3690813   -2.3295997   -1.5418265
H     0.3925556   -2.2185636   -1.9102181
C    -1.2301148   -2.6483783    1.0108705
H    -1.0466286   -2.5903646    2.0960654
H    -2.2236900   -2.2309579    0.8112502
C     1.1480319   -2.8274058    0.4143262
H     1.5019959   -2.8034353    1.4568080
H     1.9783961   -2.5193584   -0.2357639
H    -1.2767311   -3.7223819    0.7475816
H     0.9151855   -3.8819996    0.1750297
85
 Hf_PP_RS_H_isobutene_rotated+
C     2.5525628    0.3132559    0.0198658
C     2.0941907    1.5294782    0.6455773
H     2.3306598   -0.4032814   -2.0972561
C     1.4190855    2.3414202   -0.3509881
C     1.5188850    1.6101708   -1.5867798
C     2.1381456    0.3592765   -1.3426587
C    -1.4314823    1.6422858    1.5568781
C    -2.1656078    0.4840414    1.1863175
C    -2.5545445    0.6026278   -0.1883392
C    -1.9947389    1.8372005   -0.6705944
C    -1.2473875    2.4712597    0.3984593
C     3.3333656   -0.6530137    0.7424125
C     3.6116162   -0.3777937    2.0660533
H     3.4521217    1.0088015    3.7337936
C     3.1641172    0.8210097    2.6979818
H     2.1598022    2.7054403    2.4969384
C     2.4272973    1.7638203    2.0181020
H    -1.8861357    3.2004449   -2.3776957
C    -2.2425343    2.2362085   -2.0159954
H    -3.2383696    1.7354748   -3.8408396
C    -3.0102042    1.4244376   -2.8201495
C    -3.5239347    0.1895030   -2.3472210
C    -3.3123498   -0.2508199   -1.0530107
H    -2.4978332   -0.2901777    1.8735421
Si    0.1677343    3.6944574    0.0888274
C    -0.1266456    4.9144884   -1.2951834
H     0.6681098    5.6767756   -1.2466629
H    -1.0891682    5.4294666   -1.1437871
H    -0.1119463    4.4882119   -2.3060260
C     0.6103450    4.6991068    1.6020900
H     0.5808452    4.1579614    2.5560044
H    -0.1050902    5.5348235    1.6734228
H     1.6152126    5.1344115    1.4773735
Hf   -0.0364500    0.4158664   -0.0566955
C     0.0800331   -2.1884718   -0.0008869
H    -0.4917812   -0.1957588   -1.6915610
C    -0.3876862   -2.0854274    1.2682056
C     1.1017568    2.0421468   -2.9633125
H     1.2059263    1.2053646   -3.6666966
H     0.0613747    2.3818458   -3.0124374
H     1.7460431    2.8658455   -3.3072532
C    -1.0040928    1.9233608    2.9739888
H     0.0866919    1.9291579    3.1137978
H    -1.3851887    2.9027375    3.2967887
H    -1.4241218    1.1670605    3.6519855
H    -4.1186037   -0.4331330   -3.0192287
H     4.2306978   -1.0800191    2.6295867
C     3.8422765   -1.8800911    0.0678704
C     3.4359232   -3.1359487    0.5498588
C     4.7449920   -1.8039507   -1.0151233
C     3.8767831   -4.3162371   -0.0451938
H     2.7540462   -3.1770055    1.4047517
C     5.1788030   -3.0032167   -1.5977307
C     4.7484723   -4.2455942   -1.1333475
H     3.5476671   -5.2821114    0.3411662
H     5.8903240   -2.9545222   -2.4260344
H     5.1086644   -5.1588401   -1.6101778
C    -3.8076436   -1.5859745   -0.6216673
C    -3.3994507   -2.6971640   -1.3843060
C    -4.6846949   -1.7707067    0.4670274
C    -3.8198578   -3.9870103   -1.0667766
H    -2.7340609   -2.5257882   -2.2356711
C    -5.0899392   -3.0791975    0.7757968
C    -4.6650613   -4.1781077    0.0308323
H    -3.4963639   -4.8351602   -1.6726493
H    -5.7815513   -3.2289938    1.6092772
H    -5.0098065   -5.1799377    0.2933733
C    -5.2521660   -0.6247664    1.2680484
H    -4.8017372   -0.5654261    2.2727256
H    -5.1018879    0.3441918    0.7740192
H    -6.3323732   -0.7663050    1.4159875
C     5.2962386   -0.4931487   -1.5181842
H     4.7128794   -0.0984735   -2.3654969
H     5.2989599    0.2776090   -0.7344489
H     6.3281082   -0.6251830   -1.8719159
H    -0.4535159   -2.7787852   -0.7475398
H     1.0850788   -1.8393689   -0.2748415
C    -1.5653110   -2.8783682    1.7498188
H    -2.2693578   -2.2785528    2.3452149
H    -2.1058984   -3.3656503    0.9294129
C     0.3350146   -1.2825604    2.3193808
H     0.8571219   -0.3622073    1.9634484
H     1.1629494   -1.8663231    2.7544339
H    -1.1788805   -3.6610610    2.4253491
H    -0.3409190   -0.9835174    3.1316201
85
 Hf_PP_RS_H_isobutene+
C     2.5505832   -0.4021653   -0.0290898
C     2.0448324   -1.5979488   -0.6602804
H     2.2962102    0.3481628    2.0724190
C     1.3282564   -2.3837425    0.3275311
C     1.4275037   -1.6402927    1.5578713
C     2.0840525   -0.4092950    1.3190861
C    -1.6305112   -1.6435455   -1.4999441
C    -2.3074899   -0.4617977   -1.1074319
C    -2.5835531   -0.5318453    0.2949350
C    -1.9985377   -1.7555357    0.7717063
C    -1.3682355   -2.4486887   -0.3383465
C     3.4174510    0.5028377   -0.7287596
H     4.3371407    0.8934522   -2.6161622
C     3.6669549    0.2317213   -2.0627873
H     3.3542100   -1.0761401   -3.7679995
C     3.1084857   -0.9010019   -2.7193039
H     1.9748122   -2.7127722   -2.5478332
C     2.3187005   -1.8084059   -2.0472195
H    -1.7251783   -3.0206687    2.5355744
C    -2.1147778   -2.0780141    2.1557838
H    -2.9202756   -1.4783527    4.0416340
C    -2.7969520   -1.2199155    2.9885060
H    -3.9011859    0.6427772    3.1984521
C    -3.3687921   -0.0124500    2.5056202
C    -3.2766741    0.3570090    1.1794642
H    -2.6462143    0.3218169   -1.7831960
Si    0.0327398   -3.7025134   -0.1085212
C    -0.2680234   -5.0081085    1.1949296
H     0.6224826   -5.6568264    1.2379559
H    -1.1145328   -5.6320363    0.8638884
H    -0.4809802   -4.6689543    2.2155367
C     0.4318512   -4.6647044   -1.6633415
H     0.3988007   -4.0997004   -2.6024879
H    -0.2972422   -5.4872057   -1.7467291
H     1.4312610   -5.1193684   -1.5654718
C    -1.2523325   -1.9277081   -2.9298913
H    -1.6308034   -2.9114774   -3.2420602
H    -1.6944868   -1.1714462   -3.5938246
H    -0.1642281   -1.9238951   -3.0998871
C     1.0024416   -2.0469209    2.9396440
H     1.9016567   -2.1615163    3.5639065
H     0.3642245   -1.2829323    3.4072349
H     0.4750394   -3.0051357    2.9505193
C    -3.7973404    1.6650097    0.7032769
C    -4.7677088    1.7769706   -0.3145433
C    -3.2835629    2.8246605    1.3127832
C    -5.1589580    3.0643875   -0.7148203
C    -3.6892744    4.0941896    0.9034989
H    -2.5452479    2.7072852    2.1116776
C    -4.6265412    4.2118880   -0.1269245
H    -5.9202100    3.1618621   -1.4934144
H    -3.2832418    4.9839006    1.3881748
H    -4.9596207    5.1970667   -0.4585927
C     4.0043450    1.6972330   -0.0632654
C     3.7658895    2.9588702   -0.6377518
C     4.8217148    1.5943519    1.0830158
C     4.2821417    4.1214954   -0.0713179
H     3.1509479    3.0150094   -1.5418082
C     5.3321452    2.7775712    1.6372455
C     5.0631855    4.0276676    1.0828465
H     4.0835829    5.0916531   -0.5298586
H     5.9778359    2.7061188    2.5163259
H     5.4803468    4.9266169    1.5400238
Hf   -0.0603663   -0.4384891   -0.0451771
C     0.3405266    1.2085142   -1.9376009
C    -0.2851357    2.2956344   -1.3954837
H     1.3897236    1.0107279   -1.6861121
H    -0.0690013    0.7338966   -2.8353622
H    -0.4326696    0.6228104    1.3804488
C    -1.5608249    2.8284126   -1.9603325
H    -2.3617519    2.8123511   -1.2039220
H    -1.4131088    3.8886366   -2.2224444
H    -1.8812006    2.2851568   -2.8591153
C     0.2916609    3.0450277   -0.2348502
H     0.6400188    4.0325406   -0.5821695
H    -0.4891649    3.2263675    0.5202889
H     1.1420108    2.5253012    0.2314366
C     5.2218664    0.2703268    1.6859287
H     4.6103284    0.0168576    2.5666631
H     5.1277921   -0.5560734    0.9679686
H     6.2669233    0.3104598    2.0238247
C    -5.4304134    0.5752168   -0.9412455
H    -5.0333738    0.3651586   -1.9476345
H    -5.2983774   -0.3307048   -0.3344301
H    -6.5089326    0.7541699   -1.0562377
85
 Hf_PP_RS_iBu_beta+
C    -2.4406105    0.4080345    0.0174899
C    -1.9599990    1.6546731   -0.5275221
H    -2.0538668   -0.5395851    2.0221433
C    -1.1799704    2.3493597    0.4876000
C    -1.1922363    1.4886860    1.6389380
C    -1.8491930    0.2682117    1.3182061
C     1.7487906    1.7215282   -1.5311679
C     2.3812676    0.5010050   -1.1903364
C     2.6192089    0.4805851    0.2266083
C     2.0989561    1.7160244    0.7483785
C     1.4737984    2.4666109   -0.3321846
C    -3.3933242   -0.3861141   -0.6897569
C    -3.6897383    0.0002874   -1.9901872
H    -3.3844293    1.4030751   -3.6131945
C    -3.1095036    1.1449345   -2.5892799
H    -1.9187185    2.9108412   -2.3231034
C    -2.2690567    1.9802441   -1.8797103
H     1.9943839    3.0114149    2.5024140
C     2.2765529    2.0302014    2.1245483
H     3.0214149    1.3284029    4.0047669
C     2.8559411    1.0956312    2.9516089
C     3.2561658   -0.1722784    2.4549439
C     3.1721437   -0.5072313    1.1113919
H     2.6899040   -0.2590508   -1.9033709
Si    0.0863126    3.7036928    0.0539380
C     0.4521593    4.9221199    1.4248573
H    -0.3494484    5.6790913    1.4125759
H     1.3981021    5.4412671    1.1989531
H     0.5113434    4.5276877    2.4463602
C    -0.3738834    4.7566351   -1.4218115
H    -0.3085998    4.2594939   -2.3975855
H     0.3189509    5.6139185   -1.4413063
H    -1.3923671    5.1590313   -1.2985449
Hf    0.1439885    0.4451860   -0.1866968
C     0.3178778   -2.0111143   -1.0305219
H     0.9044136   -1.5708092   -0.1222869
C    -0.7146838   -2.9280479   -0.3779684
H    -1.2279738   -3.5146305   -1.1550910
H    -0.2235015   -3.6318932    0.3121068
H    -1.4824951   -2.3721503    0.1800150
C    -0.2672812   -0.8762963   -1.8792829
H    -1.3207641   -1.0527978   -2.1386424
H     0.3210144   -0.7221779   -2.7956749
C    -0.7285024    1.7828702    3.0378574
H    -0.1345902    0.9594411    3.4609470
H    -0.1416089    2.7026533    3.1048459
H    -1.6167626    1.9109573    3.6755593
C     1.3575728    2.0813610   -2.9382888
H     0.2653185    2.0943927   -3.0801402
H     1.7427108    3.0762448   -3.2038040
H     1.7705626    1.3502627   -3.6460145
H     3.6970913   -0.8984130    3.1415499
H    -4.4290600   -0.5767454   -2.5504252
C    -4.0836923   -1.5492523   -0.0708572
C    -4.0888891   -2.7698352   -0.7705731
C    -4.7881818   -1.4429331    1.1490898
C    -4.7252636   -3.8965291   -0.2593873
H    -3.5620966   -2.8254293   -1.7274762
C    -5.4217408   -2.5917966    1.6471264
C    -5.3860911   -3.8077397    0.9684368
H    -4.7093290   -4.8353425   -0.8151810
H    -5.9804151   -2.5141107    2.5835172
H    -5.8933052   -4.6793445    1.3858170
C     3.6089328   -1.8560055    0.6563068
C     3.0482503   -2.9683445    1.3146005
C     4.5809618   -2.0557165   -0.3453195
C     3.4143309   -4.2694353    0.9805649
H     2.3062067   -2.7932061    2.0997457
C     4.9257107   -3.3759841   -0.6766477
C     4.3553760   -4.4725007   -0.0332831
H     2.9703819   -5.1169730    1.5053765
H     5.6874092   -3.5387232   -1.4437048
H     4.6576234   -5.4838931   -0.3106080
C     1.3628551   -2.8381076   -1.7796843
H     1.8567721   -3.5714105   -1.1268863
H     0.8404541   -3.3803489   -2.5835251
H     2.1367115   -2.2146028   -2.2482960
C     5.3130576   -0.9230437   -1.0217020
H     4.9725925   -0.7794155   -2.0599819
H     5.1917068    0.0308024   -0.4915973
H     6.3881366   -1.1473442   -1.0713466
C    -4.9635966   -0.1414785    1.8938043
H    -4.2485569   -0.0382033    2.7259481
H    -4.8372638    0.7318127    1.2390302
H    -5.9704363   -0.0945933    2.3318467
85
 Hf_PP_RS_Me_propene+
C    -2.5736496   -0.3974387    0.0921776
C    -2.0485679   -1.5931809    0.7062627
H    -2.4189967    0.3276446   -2.0268978
C    -1.3296756   -2.3585652   -0.2903966
C    -1.4783069   -1.6277897   -1.5255544
C    -2.1693311   -0.4205565   -1.2766518
C     1.5095222   -1.5161532    1.5709962
C     2.2129026   -0.3391719    1.2079653
C     2.6375726   -0.4573581   -0.1513452
C     2.0993791   -1.6944111   -0.6502464
C     1.3609384   -2.3530039    0.4129942
C    -3.4207938    0.5072992    0.8180237
H    -4.3273651    0.8667804    2.7169653
C    -3.6670079    0.2099554    2.1461529
H    -3.4075147   -1.1672605    3.8069108
C    -3.1402869   -0.9592298    2.7694988
H    -2.0260627   -2.7793375    2.5494338
C    -2.3517870   -1.8518887    2.0787718
H     2.0663737   -3.0509563   -2.3719112
C     2.4004029   -2.0866213   -1.9895810
H     3.4577359   -1.5689662   -3.7722969
C     3.1915058   -1.2645058   -2.7586243
H     4.3425729    0.5769782   -2.8983926
C     3.7065268   -0.0359412   -2.2556310
C     3.4641545    0.3847543   -0.9623853
H     2.5004576    0.4602905    1.8891025
Si    0.0031328   -3.6406291    0.1188477
C     0.3415287   -4.8245265   -1.2860026
H    -0.4333536   -5.6082034   -1.2639801
H     1.3154953   -5.3167539   -1.1318767
H     0.3308011   -4.3777792   -2.2879995
C    -0.3599593   -4.6813699    1.6283996
H    -0.3453391   -4.1455215    2.5858002
H     0.4017069   -5.4763937    1.6829700
H    -1.3411768   -5.1705273    1.5158251
C     0.4406709    0.9748693   -1.7505507
H     0.7193474    0.3527015   -2.6249358
C    -0.3558688    2.1998727    1.0167843
H    -1.2350916    2.2518149    0.3571045
C    -0.3316959    1.2533910    1.9862704
H     0.4885712    1.2160487    2.7062956
H    -1.2010762    0.6087937    2.1747274
Hf    0.0357665   -0.3631504   -0.0375068
H     1.2912264    1.6490428   -1.5709768
C     0.7049278    3.2312686    0.8215039
H     0.8749629    3.4455468   -0.2412725
H     0.3620349    4.1717818    1.2846631
H     1.6600313    2.9450159    1.2905096
H    -0.4302254    1.5819198   -2.0526201
C    -1.0180611   -2.0246423   -2.9018497
H    -1.5241006   -2.9493456   -3.2168645
H    -1.2685632   -1.2352018   -3.6232951
H     0.0644788   -2.1972142   -2.9651305
C     1.0549811   -1.7832863    2.9818664
H     1.5153049   -2.7085422    3.3582570
H     1.3722982   -0.9643064    3.6425926
H    -0.0337054   -1.8907008    3.0832264
C    -4.0235068    1.7039058    0.1679396
C    -3.7857930    2.9664041    0.7424060
C    -4.8617921    1.5993476   -0.9635778
C    -4.3141258    4.1276905    0.1837157
H    -3.1714180    3.0238311    1.6460082
C    -5.3820547    2.7816170   -1.5107069
C    -5.1075625    4.0327612   -0.9614758
H    -4.1151057    5.0974006    0.6427361
H    -6.0422070    2.7080582   -2.3788808
H    -5.5326407    4.9306825   -1.4132885
C     3.9561702    1.6917289   -0.4503387
C     3.6578793    2.8448453   -1.2010193
C     4.6921950    1.8161710    0.7487497
C     4.0073218    4.1153502   -0.7494506
H     3.1279925    2.7297186   -2.1506123
C     5.0214041    3.1059600    1.1936335
C     4.6741158    4.2466685    0.4711313
H     3.7627867    4.9956748   -1.3463268
H     5.5953586    3.2083248    2.1186364
H     4.9518960    5.2338157    0.8450160
C     5.2216547    0.6296222    1.5184043
H     4.7541297    0.5377398    2.5116366
H     5.0729166   -0.3170616    0.9832862
H     6.3013593    0.7523900    1.6884357
C    -5.2830410    0.2758370   -1.5539924
H    -4.7246529    0.0360147   -2.4727729
H    -5.1405764   -0.5561975   -0.8509616
H    -6.3470330    0.3098209   -1.8278262
85
 Hf_PP_TS_BHE_iBu+
C    -2.6125762    0.3738601   -0.1600716
C    -1.9767203    1.5460708   -0.7154851
H    -2.5966689   -0.4143077    1.9470109
C    -1.3470067    2.2962652    0.3578794
C    -1.5847607    1.5317628    1.5526777
C    -2.2627659    0.3323156    1.2265731
C     1.6259545    1.5598394   -1.4632553
C     2.2630237    0.3286165   -1.1694125
C     2.5489972    0.2845670    0.2311129
C     1.9168798    1.4412065    0.8190704
C     1.3605800    2.2699673   -0.2417262
C    -3.4635156   -0.4559785   -0.9629056
H    -4.1030818   -0.8351676   -2.9682979
C    -3.4592492   -0.2260716   -2.3300344
H    -2.6717578    0.9151167   -3.9980606
C    -2.6623897    0.7907343   -2.9138915
H    -1.4216733    2.5108881   -2.6076065
C    -1.9409893    1.6789903   -2.1367600
H     1.3680186    2.3595311    2.7342990
C     1.8597722    1.5241081    2.2430060
H     2.5047218    0.6533522    4.0869558
C     2.5204573    0.5754103    2.9985480
H     3.9398752   -1.0656700    3.0233491
C     3.3134961   -0.4313665    2.3921456
C     3.3770962   -0.5869894    1.0181907
H     2.6124489   -0.3912428   -1.9104451
Si    0.0237431    3.5753445    0.0769180
C     0.3992569    4.7057325    1.5202948
H    -0.5300951    5.2114269    1.8303385
H     1.0879814    5.4839979    1.1519190
H     0.8603041    4.2587205    2.4088544
C    -0.3192768    4.7611831   -1.3302197
H    -0.7744436    4.3571609   -2.2420883
H     0.6222589    5.2626152   -1.6090254
H    -0.9996652    5.5369999   -0.9417396
C     1.3487633    2.0117519   -2.8705704
H     2.3055082    2.1925576   -3.3837930
H     0.8075944    1.2483005   -3.4509380
H     0.7813708    2.9483175   -2.9013435
C    -1.3003021    1.9280216    2.9741321
H    -2.2583147    2.0986341    3.4886073
H    -0.7672189    1.1386332    3.5235585
H    -0.7289132    2.8601119    3.0401483
C     4.3360386   -1.5463660    0.4053700
C     5.2490111   -1.1518765   -0.6002262
C     4.3968171   -2.8595310    0.9097946
C     6.1307314   -2.1180798   -1.1098662
C     5.2823137   -3.7997908    0.3939515
H     3.7194800   -3.1419557    1.7197336
C     6.1456381   -3.4287301   -0.6399118
H     6.8452243   -1.8145269   -1.8795197
H     5.3019474   -4.8132681    0.7977550
H     6.8477216   -4.1510957   -1.0598216
C    -4.3096790   -1.5276969   -0.3755894
C    -4.2217609   -2.8211465   -0.9238655
C    -5.2225423   -1.2737847    0.6720114
C    -4.9824744   -3.8731205   -0.4228765
H    -3.5175491   -2.9978028   -1.7427200
C    -5.9800794   -2.3489214    1.1609710
C    -5.8612942   -3.6344409    0.6368362
H    -4.8933240   -4.8703103   -0.8567501
H    -6.6998236   -2.1581884    1.9611802
H    -6.4687517   -4.4455252    1.0421482
Hf   -0.0263054    0.3196348   -0.0580915
C    -0.3606374   -1.6109690   -1.3431773
C    -0.0684560   -2.3698435   -0.1904865
H    -1.4058299   -1.5335674   -1.6622257
H     0.3978407   -1.5954839   -2.1328417
H     0.2676701   -1.1406713    1.0534549
C     1.2628115   -3.0538286   -0.0823461
H     1.5761301   -3.1663442    0.9633198
H     1.1413264   -4.0636203   -0.5103019
H     2.0499563   -2.5400799   -0.6482665
C    -1.1608543   -2.9941137    0.6351668
H    -1.4277254   -3.9514271    0.1548986
H    -0.8162811   -3.2093889    1.6555310
H    -2.0700969   -2.3843943    0.6709511
C    -5.4721260    0.1062309    1.2293974
H    -4.8839289    0.2978651    2.1412663
H    -5.2242791    0.8951567    0.5056776
H    -6.5308514    0.2149384    1.5028081
C     5.3949096    0.2711297   -1.0842183
H     4.8372901    0.4570427   -2.0161208
H     5.0465896    1.0008240   -0.3401633
H     6.4520481    0.4826098   -1.2973662
85
 Hf_PP_TS_BHE_tBu_+
C     2.5724204   -0.2833505   -0.0262309
C     2.1409841   -1.5410943   -0.5886413
H     2.2471555    0.5911319    2.0121105
C     1.4075417   -2.2750342    0.4235830
C     1.4323276   -1.4451393    1.6049346
C     2.0664856   -0.2171297    1.3025673
C    -1.5987091   -1.7258715   -1.4194283
C    -2.2965734   -0.5339570   -1.0828327
C    -2.5285588   -0.5170044    0.3341491
C    -1.9024361   -1.6965019    0.8678019
C    -1.2829612   -2.4408314   -0.2134068
C     3.4644855    0.5932403   -0.7342363
C     3.8454997    0.2148736   -2.0027732
H     3.7182882   -1.2568658   -3.6018865
C     3.3732214   -0.9979482   -2.5993115
H     2.2581398   -2.8149567   -2.3772426
C     2.5456670   -1.8647166   -1.9268961
H    -1.5968536   -2.8803939    2.6802995
C    -2.0051702   -1.9612833    2.2653666
H    -2.8111401   -1.2980300    4.1294471
C    -2.6989493   -1.0837155    3.0651972
C    -3.3115652    0.0812226    2.5294315
C    -3.2539469    0.3851436    1.1841292
H    -2.7125882    0.1708910   -1.7967195
Si    0.1498860   -3.6496239    0.0652448
C    -0.1133904   -4.8958381    1.4343411
H     0.7901730   -5.5244032    1.4988332
H    -0.9503373   -5.5518121    1.1432699
H    -0.3223143   -4.5128468    2.4401683
C     0.5644322   -4.6857664   -1.4363049
H     0.5752414   -4.1664304   -2.4015982
H    -0.1797702   -5.4962590   -1.5038405
H     1.5495508   -5.1572995   -1.2856199
Hf   -0.0306276   -0.3755397   -0.1373148
C     0.0255669    2.0970230    0.0148649
H    -0.3627216    1.0138337    1.0605291
C    -0.3683735    1.7969417   -1.3024028
C     1.0491483   -1.8029156    3.0139784
H     0.4115282   -1.0366984    3.4769997
H     0.5407141   -2.7686623    3.0789376
H     1.9695220   -1.8808048    3.6128098
C    -1.2835158   -2.1252842   -2.8385463
H    -0.2068647   -2.2630123   -3.0207103
H    -1.7827790   -3.0717052   -3.0930893
H    -1.6433711   -1.3556411   -3.5366904
H    -3.8710235    0.7448249    3.1924660
H     4.5426613    0.8470899   -2.5573331
C     3.9283893    1.8596940   -0.1015835
C     3.5419674    3.0825422   -0.6758130
C     4.7504280    1.8508788    1.0458583
C     3.9308519    4.2978213   -0.1134734
H     2.9225771    3.0721572   -1.5784223
C     5.1346491    3.0833143    1.5921560
C     4.7276926    4.2945300    1.0325910
H     3.6216799    5.2384044   -0.5720737
H     5.7861419    3.0868221    2.4698430
H     5.0477384    5.2358660    1.4827478
C    -3.8757757    1.6266712    0.6545571
C    -3.4589132    2.8498937    1.2120224
C    -4.8423668    1.6183925   -0.3720900
C    -3.9381691    4.0649376    0.7279385
H    -2.7308094    2.8295408    2.0284464
C    -5.3082246    2.8533639   -0.8496271
C    -4.8581196    4.0638331   -0.3245308
H    -3.5995860    5.0044775    1.1678093
H    -6.0615242    2.8573083   -1.6419565
H    -5.2432588    5.0052869   -0.7202543
C    -5.4315075    0.3473489   -0.9327558
H    -5.0815742    0.1502709   -1.9588918
H    -5.1887757   -0.5299728   -0.3186383
H    -6.5266834    0.4317751   -0.9830872
C     5.2587281    0.5698874    1.6584285
H     5.3363984   -0.2348362    0.9135159
H     6.2519115    0.7248335    2.1020138
H     4.5984108    0.2085540    2.4635894
H    -0.5510890    2.8474537    0.5619469
H     1.0947838    2.0723181    0.2641828
C    -1.5944064    2.4383031   -1.9090301
H    -1.9922849    1.8583592   -2.7546786
H    -2.4001963    2.6023500   -1.1828596
C     0.4948969    0.9945745   -2.2038376
H     0.3458739   -0.1626338   -2.1337409
H     1.5753739    1.1291548   -2.0771075
H    -1.3070436    3.4245794   -2.3112959
H     0.2230021    1.1232792   -3.2598541
85
 Hf_PP_TS_BME_iBu+
C    -2.5959398    0.3578142   -0.0704358
C    -2.1076423    1.5873294   -0.6455068
H    -2.3502606   -0.4771763    1.9965930
C    -1.3834359    2.3297250    0.3731272
C    -1.4733006    1.5336977    1.5695116
C    -2.1271444    0.3101637    1.2767247
C     1.5710327    1.6269285   -1.4987141
C     2.2725837    0.4449731   -1.1581586
C     2.5839340    0.4753950    0.2335218
C     1.9756039    1.6663764    0.7706294
C     1.3247503    2.3943268   -0.3054716
C    -3.4404022   -0.5313882   -0.8078492
H    -4.3741763   -0.8412060   -2.7036844
C    -3.7147187   -0.1935567   -2.1212832
H    -3.4660977    1.2190249   -3.7517876
C    -3.1975374    0.9904950   -2.7191002
H    -2.0876811    2.8077620   -2.4673233
C    -2.4109936    1.8726322   -2.0117066
H     1.7127656    2.8562421    2.5922728
C     2.1129021    1.9374173    2.1674695
H     2.9498738    1.2683242    4.0153801
C     2.8182627    1.0560229    2.9530519
H     4.0238712   -0.7526573    3.0571200
C     3.4334789   -0.1058110    2.4040091
C     3.3581889   -0.4095944    1.0585620
H     2.5960826   -0.3174358   -1.8654544
Si   -0.0692361    3.6469433   -0.0183849
C     0.2542556    4.8974844    1.3335886
H     1.1068113    5.5229164    1.0214766
H     0.4681612    4.5193540    2.3402949
H    -0.6277322    5.5552451    1.4051587
C    -0.4619524    4.6718611   -1.5331586
H    -0.4478166    4.1377700   -2.4906219
H     0.2833145    5.4817037   -1.5945221
H    -1.4511086    5.1426944   -1.4107742
C     0.3354557   -1.5361393    1.1023067
H     0.4647090   -0.6065326    1.7623941
C    -0.2108011   -2.0967229   -0.8640841
H    -1.1480181   -2.4921477   -0.4603507
C    -0.3457256   -1.0223249   -1.8034068
H     0.4424948   -0.9482303   -2.5587632
H    -1.3586440   -0.8235826   -2.1686632
Hf    0.0044363    0.3848456   -0.0526337
H     1.3107155   -2.0309675    1.1364839
C     0.8917090   -3.1083141   -1.0475963
H     1.0062067   -3.7883352   -0.1938629
H     0.6260369   -3.7132762   -1.9293067
H     1.8605782   -2.6231221   -1.2472505
H    -0.4238871   -2.1340249    1.6212374
C    -1.0559067    1.9017955    2.9667379
H    -1.9602338    2.0549869    3.5750576
H    -0.4646689    1.1093976    3.4504442
H    -0.4818654    2.8320943    2.9990494
C     1.1492807    1.9418110   -2.9096956
H     1.5290221    2.9268332   -3.2167252
H     1.5579837    1.1916305   -3.6003686
H     0.0563127    1.9486348   -3.0415581
C    -3.9902688   -1.7709955   -0.1930351
C    -3.7159009   -3.0009965   -0.8185546
C    -4.8076429   -1.7401296    0.9575986
C    -4.1909530   -4.2015006   -0.2952687
H    -3.1139914   -3.0004209   -1.7327292
C    -5.2760710   -2.9602664    1.4675460
C    -4.9678659   -4.1787846    0.8651081
H    -3.9644084   -5.1454325   -0.7936355
H    -5.9211574   -2.9439863    2.3499408
H    -5.3531258   -5.1080495    1.2884214
C     3.9955591   -1.6293235    0.4930598
C     3.7412467   -2.8635425    1.1224207
C     4.8382486   -1.5930962   -0.6402899
C     4.2327201   -4.0595033    0.6063676
H     3.1315429   -2.8743270    2.0306296
C     5.3113630   -2.8110705   -1.1530918
C     5.0041584   -4.0332713   -0.5580581
H     4.0162488   -5.0038630    1.1085541
H     5.9656005   -2.7884154   -2.0287628
H     5.3924535   -4.9599583   -0.9842495
C     5.3303892   -0.3094631   -1.2648633
H     4.8953598   -0.1386293   -2.2622059
H     5.1098332    0.5689942   -0.6447988
H     6.4205719   -0.3607808   -1.3996707
C    -5.2523855   -0.4542484    1.6102720
H    -4.6559811   -0.2169310    2.5058620
H    -5.1788642    0.4026269    0.9265796
H    -6.2981470   -0.5400742    1.9374277
12
 isobutene
C    -0.0000264    1.4611024   -0.0000233
C     0.0000004    0.1224715   -0.0000040
H    -0.9346327    2.0279782    0.0002546
H     0.9345549    2.0280197   -0.0003580
C     1.2724621   -0.6785516   -0.0001771
H     1.3198557   -1.3364643    0.8836697
H     1.3187968   -1.3379718   -0.8829475
H     2.1611967   -0.0327780   -0.0012201
C    -1.2724387   -0.6785927    0.0002028
H    -1.3198008   -1.3365705   -0.8835983
H    -1.3187648   -1.3379483    0.8830204
H    -2.1611904   -0.0328428    0.0011884
9
 propene
C    -1.2810388    0.2220016   -0.0000133
C    -0.1318341   -0.4580142    0.0000130
H    -2.2472312   -0.2871268   -0.0000018
H    -1.2897084    1.3166397   -0.0000494
C     1.2314552    0.1633903    0.0000013
H     1.8111750   -0.1504635    0.8831633
H     1.8112035   -0.1505531   -0.8831097
H     1.1697820    1.2615435   -0.0000541
H    -0.1667149   -1.5543061    0.0000462
85
 Zr_PP_RS_CMe3+
C     2.5512344    0.2386406    0.1846898
C     1.9070754    1.3733715    0.8038009
H     2.6098413   -0.3987334   -1.9619798
C     1.3639746    2.2321041   -0.2365386
C     1.6165951    1.5452047   -1.4732997
C     2.2616719    0.3088611   -1.2074850
C    -1.6646566    1.5827147    1.5440173
C    -2.3531266    0.3973707    1.1886351
C    -2.6199136    0.4332613   -0.2166802
C    -1.9356152    1.5934974   -0.7412032
C    -1.3438984    2.3333744    0.3620134
C     3.3876580   -0.6440076    0.9514022
C     3.2416274   -0.5921483    2.3250994
H     2.2552579    0.3179806    4.0315979
C     2.3608564    0.3347497    2.9452321
H     1.1946938    2.1226972    2.7469711
C     1.7365746    1.3387500    2.2234600
H    -1.3061249    2.5818162   -2.5950830
C    -1.8426539    1.7431703   -2.1578570
H    -2.4882507    0.9925807   -4.0570837
C    -2.5232959    0.8575876   -2.9747040
C    -3.3325990   -0.1722031   -2.4338394
C    -3.4152691   -0.4042216   -1.0688704
H    -2.7411973   -0.3360289    1.8928437
Si    0.0702550    3.5707996    0.1178243
C    -0.2329235    4.8073319   -1.2529128
H     0.7248327    5.2776112   -1.5303501
H    -0.8780988    5.5996580   -0.8384994
H    -0.7145604    4.4424922   -2.1680445
C     0.5082718    4.6244062    1.6000369
H     0.9645111    4.1138464    2.4569630
H    -0.3896150    5.1596337    1.9499117
H     1.2280884    5.3845222    1.2538157
Zr   -0.0598506    0.2843543    0.0253213
C    -0.4416905   -1.9047115   -1.2096303
H    -0.5764197   -0.8574093   -1.6733635
C    -0.1315785   -1.9755456    0.2875581
C     1.3867791    2.0533420   -2.8697720
H     0.8410263    1.3288059   -3.4926472
H     0.8477342    3.0072726   -2.8799232
H     2.3619094    2.2264562   -3.3502519
C    -1.4384998    1.9843010    2.9743313
H    -0.8155918    2.8812095    3.0646802
H    -2.4132202    2.2207740    3.4279670
H    -0.9929151    1.1719684    3.5674985
H    -3.9369950   -0.7843525   -3.1070389
H     3.8487158   -1.2508087    2.9500117
C     4.3930577   -1.5279825    0.3057558
C     4.4710035   -2.8771014    0.6988406
C     5.3244749   -1.0223871   -0.6316417
C     5.4099712   -3.7412988    0.1442041
H     3.7649628   -3.2508238    1.4440658
C     6.2614073   -1.9122501   -1.1770588
C     6.3038681   -3.2563557   -0.8126400
H     5.4440808   -4.7856225    0.4580967
H     6.9932392   -1.5245368   -1.8904199
H     7.0481686   -3.9183851   -1.2585660
C    -4.3005268   -1.4679952   -0.5269083
C    -4.2123879   -2.7603216   -1.0784005
C    -5.2445360   -1.2097777    0.4922654
C    -4.9882496   -3.8095724   -0.5958184
H    -3.5083362   -2.9410818   -1.8956564
C    -6.0165154   -2.2824180    0.9632411
C    -5.8868205   -3.5696323    0.4463526
H    -4.8943826   -4.8057143   -1.0306919
H    -6.7573323   -2.0878236    1.7431158
H    -6.5038700   -4.3792700    0.8397407
C    -5.5211218    0.1715212    1.0347635
H    -5.0115812    0.3512970    1.9949336
H    -5.2075520    0.9621573    0.3392176
H    -6.5982007    0.2902465    1.2182664
C     5.4175296    0.4367461   -1.0087062
H     4.8237565    0.6750490   -1.9062542
H     5.0707059    1.0973401   -0.2012875
H     6.4604145    0.6972226   -1.2361197
H    -1.4102635   -2.3546555   -1.4724052
H     0.3572486   -2.3255916   -1.8369639
C    -1.2629898   -2.6125687    1.0991927
H    -1.1016258   -2.4655270    2.1796385
H    -2.2583870   -2.2279826    0.8462086
C     1.1357649   -2.7858813    0.5314611
H     1.4942907   -2.6702627    1.5665928
H     1.9539057   -2.5077658   -0.1470854
H    -1.2862016   -3.7048395    0.9225115
H     0.9306287   -3.8623422    0.3783537
85
 Zr_PP_RS_H_isobutene_rotated+
C    -2.5645142    0.3453515   -0.0367823
C    -2.0957749    1.5674229   -0.6457567
H    -2.3060345   -0.4357228    2.0507610
C    -1.3965139    2.3470503    0.3589356
C    -1.4727842    1.5791039    1.5751078
C    -2.1071909    0.3404351    1.3120642
C     1.5732610    1.7316303   -1.4768571
C     2.2930697    0.5619351   -1.1111402
C     2.5742073    0.6123835    0.2913668
C     1.9521018    1.8065924    0.7963306
C     1.2916985    2.4975136   -0.2976184
C    -3.4251257   -0.5634628   -0.7412673
C    -3.7478447   -0.2449330   -2.0445649
H    -3.5501415    1.1469565   -3.7047034
C    -3.2466277    0.9331091   -2.6783745
H    -2.1365491    2.7566382   -2.4927082
C    -2.4410109    1.8271974   -2.0118980
H     1.6688125    3.0467327    2.5765087
C     2.0838248    2.1218018    2.1803039
H     2.9506462    1.5320347    4.0424880
C     2.8123051    1.2800120    2.9897386
C     3.4058285    0.0935681    2.4837049
C     3.3002080   -0.2700571    1.1548390
H     2.6802094   -0.1791624   -1.8058689
Si   -0.1408873    3.7117445   -0.0433116
C     0.1285219    4.9975168    1.2866753
H    -0.7771283    5.6241448    1.3403919
H     0.9598031    5.6479930    0.9682832
H     0.3481262    4.6450838    2.3012121
C    -0.5639658    4.7023125   -1.5736287
H    -0.5375992    4.1620348   -2.5271357
H     0.1547169    5.5351009   -1.6450855
H    -1.5667225    5.1440883   -1.4524955
Zr    0.0498364    0.4065487   -0.0477043
C    -0.0400029   -2.2575399   -0.0948619
H     0.4592503   -0.4115709    1.5202966
C     0.3958305   -2.0239613   -1.3594661
C    -1.0671130    1.9812010    2.9638372
H    -0.4357091    1.2150666    3.4362056
H    -0.5371929    2.9377091    2.9854168
H    -1.9748192    2.0979381    3.5754889
C     1.2077594    2.0599518   -2.9018553
H     0.1214265    2.1219070   -3.0684472
H     1.6405343    3.0266087   -3.1972388
H     1.6062125    1.2924909   -3.5810781
H     3.9707252   -0.5518641    3.1599561
H    -4.4253314   -0.9015651   -2.5954675
C    -3.9362410   -1.7938637   -0.0746494
C    -3.5708406   -3.0451986   -0.5997154
C    -4.7887855   -1.7261070    1.0482136
C    -4.0063724   -4.2306131   -0.0100280
H    -2.9288340   -3.0806073   -1.4856258
C    -5.2190795   -2.9300259    1.6236387
C    -4.8305497   -4.1689840    1.1150870
H    -3.7108833   -5.1933108   -0.4300678
H    -5.8930704   -2.8876264    2.4831376
H    -5.1863431   -5.0863088    1.5874072
C     3.8521199   -1.5613858    0.6655232
C     3.4107772   -2.7331436    1.3090474
C     4.7914372   -1.6510241   -0.3825675
C     3.8538717   -3.9909213    0.9051749
H     2.6979302   -2.6356330    2.1332671
C     5.2187126   -2.9279691   -0.7803245
C     4.7567263   -4.0868950   -0.1582597
H     3.5023630   -4.8881769    1.4174583
H     5.9555772   -3.0057291   -1.5842962
H     5.1174610   -5.0627369   -0.4884500
C     5.4015111   -0.4388368   -1.0428081
H     5.0313960   -0.3023492   -2.0720035
H     5.1982024    0.4851300   -0.4854858
H     6.4922923   -0.5580927   -1.1134348
C    -5.2877095   -0.4162317    1.6054122
H    -4.6716395   -0.0675412    2.4500079
H    -5.2860617    0.3789846    0.8465441
H    -6.3140507   -0.5282449    1.9816627
H     0.5460861   -2.8606188    0.6005612
H    -1.0554850   -1.9786646    0.2168871
C     1.6261929   -2.6735453   -1.9247716
H     2.1825767   -2.0106904   -2.6032505
H     2.2983105   -3.0527151   -1.1448622
C    -0.4169116   -1.1669355   -2.2897981
H    -0.0899320   -0.0904612   -2.2894150
H    -1.4937758   -1.1947992   -2.0815833
H     1.2935031   -3.5296562   -2.5362719
H    -0.2499306   -1.4358916   -3.3424766
85
 Zr_PP_RS_H_isobutene+
C    -2.5705737    0.4394559   -0.0292340
C    -2.0360987    1.6182394   -0.6632589
H    -2.3375628   -0.3085964    2.0762282
C    -1.2914190    2.3804265    0.3215162
C    -1.4143915    1.6514834    1.5596283
C    -2.1082406    0.4420429    1.3197870
C     1.5904237    1.6075478   -1.5357298
C     2.3031009    0.4428135   -1.1469693
C     2.6378750    0.5464212    0.2386369
C     2.0902954    1.7892779    0.7095821
C     1.3893308    2.4392666   -0.3793375
C    -3.4623968   -0.4432152   -0.7223568
H    -4.4468982   -0.7818264   -2.5862441
C    -3.7523449   -0.1393154   -2.0401827
H    -3.4851551    1.2083067   -3.7240833
C    -3.2006643    1.0027231   -2.6908254
H    -2.0079868    2.7774714   -2.5251976
C    -2.3602522    1.8718125   -2.0319102
H     2.0261358    3.1767565    2.4019352
C     2.3497390    2.1962990    2.0530764
H     3.3125400    1.6845162    3.8902257
C     3.0814881    1.3692307    2.8714344
H     4.1179109   -0.5317630    3.1031311
C     3.5582582    0.1078579    2.4170051
C     3.3587076   -0.3239403    1.1223179
H     2.6244625   -0.3481565   -1.8216418
Si    0.0010150    3.6980841   -0.1033477
C     0.3011315    4.9159951    1.2811990
H    -0.4778280    5.6935896    1.2206428
H     1.2753916    5.4114962    1.1400254
H     0.2659239    4.4927879    2.2927704
C    -0.3895174    4.7064883   -1.6281292
H    -0.3563606    4.1598504   -2.5788072
H     0.3483924    5.5231749   -1.6900463
H    -1.3848390    5.1681739   -1.5236921
C     1.1818733    1.8849724   -2.9585390
H     1.6064168    2.8401532   -3.3001331
H     1.5642887    1.0954471   -3.6210299
H     0.0913603    1.9362959   -3.0962054
C    -0.9763254    2.0649595    2.9348157
H    -1.6000173    2.9017798    3.2856542
H    -1.0975994    1.2280848    3.6357726
H     0.0712483    2.3804343    2.9787694
C     3.8065557   -1.6673839    0.6676412
C     4.7385280   -1.8442956   -0.3759171
C     3.2500958   -2.7889817    1.3090975
C     5.0496528   -3.1559049   -0.7676917
C     3.5719595   -4.0838363    0.9044680
H     2.5494629   -2.6225650    2.1332876
C     4.4713685   -4.2649793   -0.1501588
H     5.7807946   -3.3045585   -1.5667475
H     3.1342467   -4.9442504    1.4138662
H     4.7398315   -5.2709373   -0.4779083
C    -4.0326035   -1.6470157   -0.0562432
C    -3.7520722   -2.9084259   -0.6114813
C    -4.8618801   -1.5502362    1.0814133
C    -4.2451458   -4.0770093   -0.0345901
H    -3.1280311   -2.9593683   -1.5099609
C    -5.3496786   -2.7386098    1.6445643
C    -5.0431224   -3.9883094    1.1080796
H    -4.0157795   -5.0474664   -0.4776967
H    -6.0054542   -2.6730663    2.5166409
H    -5.4433148   -4.8918421    1.5713878
Zr    0.0882690    0.3986705   -0.0018007
C    -0.4547755   -1.0953090   -2.1415416
C     0.2429291   -2.0085402   -1.4158828
H    -1.4608995   -0.7892220   -1.8455142
H    -0.1099546   -0.7921605   -3.1335329
H     0.5250933   -0.1398845    1.6825663
C     1.4656254   -2.6923020   -1.9435040
H     2.3035507   -2.6536418   -1.2318292
H     1.2240568   -3.7590720   -2.0833560
H     1.7771787   -2.2826338   -2.9140330
C    -0.1853248   -2.3472489   -0.0225164
H     0.1082895   -3.3650083    0.2699406
H     0.3742763   -1.7326822    0.7544329
H    -1.2650147   -2.2129304    0.1448197
C    -5.2861835   -0.2262823    1.6669879
H    -4.6736940    0.0532483    2.5392322
H    -5.2113973    0.5900095    0.9350573
H    -6.3281132   -0.2807683    2.0123036
C     5.4335998   -0.6852973   -1.0459545
H     5.0162761   -0.4801292   -2.0451855
H     5.3566814    0.2375688   -0.4552728
H     6.4999584   -0.9118640   -1.1874577
85
 Zr_PP_RS_iBu_beta+
C    -2.4570304    0.4395092   -0.0163316
C    -1.9624081    1.6689018   -0.5861246
H    -2.1261917   -0.4492668    2.0228613
C    -1.2039016    2.3902457    0.4269604
C    -1.2483412    1.5650113    1.6034886
C    -1.9059964    0.3410179    1.3038174
C     1.7591048    1.7518625   -1.5494511
C     2.4148342    0.5512915   -1.1934614
C     2.6494503    0.5504218    0.2229811
C     2.1036369    1.7804874    0.7319756
C     1.4684435    2.5063803   -0.3577055
C    -3.3887256   -0.3800987   -0.7232905
C    -3.6615421   -0.0283056   -2.0381154
H    -3.3385194    1.3414366   -3.6865861
C    -3.0785350    1.1077868   -2.6528814
H    -1.8992141    2.8840221   -2.4095059
C    -2.2531496    1.9627235   -1.9495863
H     1.9401725    3.0692799    2.4879500
C     2.2475796    2.0946161    2.1130709
H     2.9639100    1.4007619    4.0069598
C     2.8248891    1.1674198    2.9500914
C     3.2597294   -0.0930531    2.4600801
C     3.2062713   -0.4274378    1.1150216
H     2.7341545   -0.2160206   -1.8944916
Si    0.0659618    3.7390305   -0.0101608
C     0.4114090    4.9831597    1.3427368
H    -0.4131649    5.7151747    1.3336603
H     1.3370350    5.5278454    1.0937930
H     0.5012438    4.6063989    2.3685633
C    -0.3824402    4.7675982   -1.5066385
H    -0.3087077    4.2567549   -2.4745303
H     0.3068201    5.6274925   -1.5338699
H    -1.4035654    5.1673167   -1.3967695
Zr    0.1606719    0.4613430   -0.1476618
C     0.3735985   -1.9944531   -1.0537809
H     0.9749870   -1.5598416   -0.1601019
C    -0.6538781   -2.9126160   -0.3925855
H    -1.1785451   -3.4964167   -1.1641923
H    -0.1579522   -3.6189483    0.2915585
H    -1.4149191   -2.3547963    0.1753518
C    -0.2229487   -0.8596413   -1.8795809
H    -1.2828735   -1.0157341   -2.1255344
H     0.3568745   -0.6611340   -2.7922510
C    -0.8041036    1.8986999    3.0001992
H    -0.2122336    1.0900649    3.4545054
H    -0.2228803    2.8234024    3.0492142
H    -1.7001747    2.0399587    3.6240826
C     1.3766326    2.0949400   -2.9627092
H     0.2857641    2.1013196   -3.1129492
H     1.7593456    3.0890580   -3.2349529
H     1.8004217    1.3602492   -3.6604913
H     3.6993602   -0.8118765    3.1552377
H    -4.3848833   -0.6246189   -2.5990657
C    -4.0777939   -1.5360092   -0.0890539
C    -4.0477434   -2.7754628   -0.7538755
C    -4.8137508   -1.4070985    1.1099670
C    -4.6786521   -3.8977670   -0.2260922
H    -3.5002654   -2.8483801   -1.6978616
C    -5.4409132   -2.5516337    1.6255466
C    -5.3696347   -3.7855788    0.9829450
H    -4.6354926   -4.8511417   -0.7550367
H    -6.0233638   -2.4567009    2.5457417
H    -5.8730133   -4.6533026    1.4128910
C     3.6671022   -1.7678502    0.6586751
C     3.1141329   -2.8926919    1.3019207
C     4.6513683   -1.9468049   -0.3352545
C     3.4999693   -4.1862350    0.9605561
H     2.3628950   -2.7339520    2.0819386
C     5.0156796   -3.2598026   -0.6744062
C     4.4530646   -4.3688180   -0.0457880
H     3.0620652   -5.0436563    1.4743000
H     5.7868510   -3.4064618   -1.4352065
H     4.7706963   -5.3739469   -0.3286318
C     1.4124591   -2.8143043   -1.8214646
H     1.9192219   -3.5434769   -1.1734964
H     0.8880170   -3.3601559   -2.6213067
H     2.1776105   -2.1830246   -2.2950568
C     5.3770143   -0.7988512   -0.9928539
H     5.0410424   -0.6432351   -2.0308183
H     5.2444866    0.1465039   -0.4501358
H     6.4542464   -1.0131663   -1.0393851
C    -5.0281718   -0.0878749    1.8119465
H    -4.3428068    0.0463480    2.6644128
H    -4.8893417    0.7684637    1.1375986
H    -6.0497070   -0.0408548    2.2146397
85
 Zr_PP_RS_Me_propene+
C     2.5873662    0.4279191    0.0900023
C     2.0612700    1.6217581    0.7065221
H     2.4453553   -0.2866140   -2.0342578
C     1.3423309    2.3886060   -0.2890987
C     1.5006211    1.6642579   -1.5286172
C     2.1908913    0.4581401   -1.2821473
C    -1.5267627    1.5610745    1.5644637
C    -2.2343341    0.3880810    1.2012535
C    -2.6477890    0.5026838   -0.1629306
C    -2.0996699    1.7348948   -0.6624436
C    -1.3603441    2.3908412    0.4031038
C     3.4276142   -0.4822331    0.8161270
H     4.3244623   -0.8515779    2.7182705
C     3.6687067   -0.1906223    2.1469324
H     3.4042378    1.1805911    3.8115045
C     3.1414788    0.9767140    2.7720743
H     2.0291417    2.7987931    2.5551953
C     2.3565437    1.8735021    2.0814673
H    -2.0475533    3.0860564   -2.3867759
C    -2.3887818    2.1246252   -2.0035521
H    -3.4333216    1.6043920   -3.7939532
C    -3.1770627    1.3023051   -2.7769589
H    -4.3353171   -0.5337109   -2.9195944
C    -3.7015905    0.0787287   -2.2741195
C    -3.4728289   -0.3374648   -0.9760292
H    -2.5269668   -0.4091678    1.8830918
Si    0.0074387    3.6711956    0.1157557
C    -0.3218637    4.8581982   -1.2885009
H     0.4592116    5.6357296   -1.2666746
H    -1.2917614    5.3578652   -1.1326243
H    -0.3161329    4.4126219   -2.2910000
C     0.3686753    4.7088220    1.6278104
H     0.3551231    4.1713773    2.5842838
H    -0.3932021    5.5035003    1.6842723
H     1.3497764    5.1982904    1.5154601
C    -0.4334257   -0.9371980   -1.7832008
H    -0.6923753   -0.3102357   -2.6591652
C     0.3246129   -2.1951667    1.0433617
H     1.2031485   -2.2536589    0.3823658
C     0.3170373   -1.2581865    2.0210013
H    -0.5021708   -1.2105648    2.7427120
H     1.1926932   -0.6205060    2.2040193
Zr   -0.0310529    0.3882724   -0.0296390
H    -1.2940091   -1.5983301   -1.6002668
C    -0.7488371   -3.2117509    0.8369288
H    -0.9434128   -3.3869013   -0.2293041
H    -0.4048688   -4.1719307    1.2568722
H    -1.6916023   -2.9351876    1.3357754
H     0.4387440   -1.5533895   -2.0626270
C     1.0465989    2.0701106   -2.9038698
H     1.5462660    3.0027337   -3.2055698
H     1.3087552    1.2907391   -3.6321395
H    -0.0372147    2.2343494   -2.9710513
C    -1.0729657    1.8284452    2.9752890
H    -1.5162974    2.7651431    3.3437594
H    -1.4074586    1.0198006    3.6403788
H     0.0177593    1.9164961    3.0782048
C     4.0283525   -1.6786033    0.1639422
C     3.7803031   -2.9426090    0.7304334
C     4.8733148   -1.5726678   -0.9624804
C     4.3043189   -4.1039973    0.1676549
H     3.1622863   -3.0013189    1.6314334
C     5.3893040   -2.7549263   -1.5135657
C     5.1039997   -4.0074878   -0.9730400
H     4.0972408   -5.0749836    0.6203757
H     6.0545960   -2.6805328   -2.3777413
H     5.5258821   -4.9054564   -1.4277561
C    -3.9791842   -1.6385425   -0.4628238
C    -3.6839597   -2.7970455   -1.2062515
C    -4.7279024   -1.7516272    0.7295919
C    -4.0494376   -4.0626254   -0.7533701
H    -3.1441721   -2.6908154   -2.1513609
C    -5.0735089   -3.0366235    1.1757192
C    -4.7296819   -4.1831570    0.4607985
H    -3.8069932   -4.9473902   -1.3445015
H    -5.6574981   -3.1302694    2.0953390
H    -5.0204615   -5.1662848    0.8353848
C    -5.2534272   -0.5573766    1.4900502
H    -4.7890572   -0.4619280    2.4844455
H    -5.0970705    0.3851154    0.9495622
H    -6.3344380   -0.6727759    1.6567851
C     5.3060040   -0.2483255   -1.5428815
H     4.7563956   -0.0009565   -2.4649907
H     5.1623495    0.5808741   -0.8366650
H     6.3719818   -0.2864417   -1.8083711
85
 Zr_PP_TS_BHE_iBu+
C    -2.6363732    0.4230342   -0.1140765
C    -2.0590949    1.6314742   -0.6535110
H    -2.4933112   -0.4438291    1.9572764
C    -1.3558223    2.3373233    0.4027610
C    -1.5235736    1.5278640    1.5826277
C    -2.2092692    0.3348917    1.2496713
C     1.6513505    1.6268235   -1.4683897
C     2.3005791    0.4055871   -1.1716378
C     2.5758244    0.3557992    0.2332531
C     1.9448610    1.5139991    0.8149285
C     1.3674456    2.3298977   -0.2438854
C    -3.5248735   -0.3862313   -0.8982278
H    -4.3179045   -0.6637119   -2.8635479
C    -3.6413090   -0.0722218   -2.2428480
H    -3.0867985    1.2343335   -3.8827316
C    -2.9516058    1.0247532   -2.8202589
H    -1.7741854    2.7888327   -2.4921925
C    -2.1893582    1.8836515   -2.0515482
H     1.5026218    2.5248478    2.7060569
C     1.9592209    1.6587990    2.2328890
H     2.6848660    0.8556963    4.0774579
C     2.6440437    0.7340441    2.9936349
H     4.0188091   -0.9441954    3.0210349
C     3.3871973   -0.3132842    2.3916482
C     3.4031434   -0.5134603    1.0219793
H     2.6554905   -0.3094371   -1.9142630
Si    0.0119680    3.6155124    0.0740263
C     0.3602107    4.7959129    1.4810526
H    -0.5376520    5.4149854    1.6433226
H     1.1721594    5.4695477    1.1614288
H     0.6505267    4.3653034    2.4466866
C    -0.3335402    4.7115337   -1.4030071
H    -0.2858433    4.2259967   -2.3850797
H     0.4104655    5.5246097   -1.4022935
H    -1.3278438    5.1739043   -1.2914048
C     1.3302681    2.0448729   -2.8791890
H     1.7357301    3.0467294   -3.0814304
H     1.7854855    1.3439726   -3.5918167
H     0.2518866    2.0767398   -3.0920183
C    -1.1707613    1.8692330    3.0033576
H    -2.1045080    1.9824768    3.5751730
H    -0.5809283    1.0771258    3.4868997
H    -0.6291890    2.8172425    3.0812012
C     4.3125803   -1.5262153    0.4191343
C     5.2248246   -1.2001370   -0.6101410
C     4.3209382   -2.8272399    0.9570830
C     6.0489426   -2.2200643   -1.1122540
C     5.1501892   -3.8216196    0.4492732
H     3.6451245   -3.0550212    1.7859076
C     6.0095484   -3.5180740   -0.6100123
H     6.7626267   -1.9700210   -1.9017257
H     5.1300243   -4.8245748    0.8786064
H     6.6678053   -4.2837196   -1.0242388
C    -4.2977987   -1.5165930   -0.3186092
C    -4.2173641   -2.7706668   -0.9530593
C    -5.1379126   -1.3559533    0.8051940
C    -4.9088549   -3.8750154   -0.4649971
H    -3.5725914   -2.8748582   -1.8311533
C    -5.8253133   -2.4831659    1.2809747
C    -5.7102436   -3.7301665    0.6705486
H    -4.8259329   -4.8403375   -0.9669222
H    -6.4882452   -2.3643100    2.1419183
H    -6.2620781   -4.5837321    1.0680831
Zr   -0.0286944    0.3732720   -0.1194628
C    -0.3993719   -1.5352885   -1.4796111
C    -0.0627638   -2.3377059   -0.3763442
H    -1.4544041   -1.4199563   -1.7543519
H     0.3392018   -1.4442636   -2.2840390
H     0.2861906   -1.1471338    0.9183083
C     1.2816796   -3.0062655   -0.3355428
H     1.6209353   -3.1679768    0.6949088
H     1.1655895   -3.9957599   -0.8099990
H     2.0517997   -2.4532371   -0.8886269
C    -1.1184095   -3.0109613    0.4608634
H    -1.4079312   -3.9428708   -0.0545826
H    -0.7275167   -3.2779458    1.4519420
H    -2.0241796   -2.4049834    0.5729039
C    -5.3903517   -0.0205944    1.4617764
H    -4.7744343    0.1210819    2.3644080
H    -5.1840748    0.8197401    0.7846241
H    -6.4404473    0.0481058    1.7785309
C     5.4317949    0.2035088   -1.1275456
H     4.9079609    0.3817239   -2.0802124
H     5.0897427    0.9648670   -0.4131641
H     6.5011174    0.3734888   -1.3164701
85
 Zr_PP_TS_BHE_tBu+
C    -2.5844396    0.3281088   -0.0371818
C    -2.1467766    1.5802657   -0.6070159
H    -2.2671414   -0.5335823    2.0085083
C    -1.4113213    2.3177407    0.4015244
C    -1.4440721    1.4965948    1.5888884
C    -2.0822610    0.2691805    1.2940250
C     1.6191738    1.7632142   -1.4371545
C     2.3227252    0.5768334   -1.0963277
C     2.5507915    0.5637550    0.3211611
C     1.9171250    1.7401849    0.8511708
C     1.2923537    2.4770373   -0.2338684
C    -3.4727418   -0.5523396   -0.7439446
C    -3.8435102   -0.1839322   -2.0191055
H    -3.7054409    1.2757103   -3.6276457
C    -3.3665985    1.0232775   -2.6212771
H    -2.2517494    2.8412559   -2.4050461
C    -2.5419346    1.8942831   -1.9495808
H     1.6040821    2.9289635    2.6588241
C     2.0184847    2.0113562    2.2465273
H     2.8312243    1.3600907    4.1126061
C     2.7189534    1.1406858    3.0493730
C     3.3346159   -0.0241074    2.5184423
C     3.2760887   -0.3343916    1.1740480
H     2.7411036   -0.1301134   -1.8072617
Si   -0.1455562    3.6841480    0.0368349
C     0.1172638    4.9380847    1.3989079
H    -0.7893171    5.5622063    1.4645299
H     0.9495021    5.5969093    1.1008824
H     0.3329029    4.5609412    2.4055113
C    -0.5547259    4.7114889   -1.4722589
H    -0.5697101    4.1851863   -2.4337133
H     0.1942985    5.5169779   -1.5464623
H    -1.5368366    5.1900258   -1.3241591
Zr    0.0318955    0.3986769   -0.1538308
C    -0.0214935   -2.1014734   -0.0053751
H     0.3714569   -0.9820545    1.0633232
C     0.3769565   -1.8059323   -1.3171586
C    -1.0533027    1.8602531    2.9941587
H    -0.4136124    1.0952942    3.4568848
H    -0.5446041    2.8263212    3.0524854
H    -1.9702200    1.9403724    3.5980870
C     1.2972155    2.1556496   -2.8566503
H     0.2173418    2.2682214   -3.0389472
H     1.7735055    3.1143320   -3.1091599
H     1.6762218    1.3958418   -3.5554071
H     3.8945386   -0.6845430    3.1842348
H    -4.5376105   -0.8198124   -2.5734006
C    -3.9442845   -1.8130973   -0.1054895
C    -3.5647909   -3.0409195   -0.6738661
C    -4.7679212   -1.7947237    1.0407351
C    -3.9600835   -4.2514988   -0.1059785
H    -2.9466989   -3.0386173   -1.5774074
C    -5.1584326   -3.0226036    1.5929160
C    -4.7569091   -4.2386317    1.0400584
H    -3.6559609   -5.1957837   -0.5603399
H    -5.8109512   -3.0184485    2.4698387
H    -5.0818118   -5.1760968    1.4947717
C     3.8920429   -1.5815469    0.6504376
C     3.4699619   -2.7990351    1.2167196
C     4.8576678   -1.5850455   -0.3770377
C     3.9443535   -4.0196624    0.7418624
H     2.7421317   -2.7694202    2.0331332
C     5.3178632   -2.8255532   -0.8459478
C     4.8638096   -4.0302106   -0.3110705
H     3.6024980   -4.9544342    1.1893141
H     6.0704686   -2.8384361   -1.6388415
H     5.2453337   -4.9761280   -0.6995693
C     5.4532341   -0.3208781   -0.9465650
H     5.1102360   -0.1333313   -1.9768489
H     5.2091204    0.5629884   -0.3424609
H     6.5485291   -0.4084531   -0.9893118
C    -5.2735087   -0.5089982    1.6457587
H    -4.6179499   -0.1492397    2.4554610
H    -5.3411810    0.2941181    0.8981238
H    -6.2710720   -0.6574692    2.0817117
H     0.5512294   -2.8432125    0.5568078
H    -1.0901404   -2.0538024    0.2438217
C     1.6122990   -2.4331064   -1.9164986
H     2.0232813   -1.8384614   -2.7453748
H     2.4048314   -2.6145712   -1.1799454
C    -0.4910617   -1.0160489   -2.2306990
H    -0.3099184    0.1287876   -2.2011898
H    -1.5696099   -1.1315280   -2.0680197
H     1.3271754   -3.4100684   -2.3429911
H    -0.2543689   -1.1976277   -3.2877897
85
 Zr_PP_TS_BME_iBu+
C    -2.6132166    0.3959218   -0.0789055
C    -2.1207770    1.6217832   -0.6572517
H    -2.3807893   -0.4292822    1.9941385
C    -1.3974736    2.3667998    0.3613536
C    -1.4989939    1.5784314    1.5620981
C    -2.1528719    0.3548525    1.2721954
C     1.5815946    1.6708391   -1.5040243
C     2.2880296    0.4936458   -1.1633928
C     2.5917243    0.5212062    0.2309677
C     1.9784806    1.7100520    0.7673404
C     1.3241313    2.4344321   -0.3092703
C    -3.4516789   -0.4976726   -0.8168001
H    -4.3722882   -0.8185813   -2.7178368
C    -3.7176876   -0.1670287   -2.1343339
H    -3.4598651    1.2377777   -3.7695731
C    -3.1976923    1.0139043   -2.7341948
H    -2.0895383    2.8331138   -2.4846545
C    -2.4152467    1.9003212   -2.0258975
H     1.7024547    2.8951661    2.5901294
C     2.1077858    1.9788669    2.1647005
H     2.9396772    1.3092395    4.0149667
C     2.8130872    1.0979572    2.9517674
H     4.0245952   -0.7062548    3.0584385
C     3.4344096   -0.0606912    2.4039244
C     3.3655464   -0.3627728    1.0573901
H     2.6162942   -0.2670091   -1.8704825
Si   -0.0779593    3.6813165   -0.0277829
C     0.2377556    4.9339663    1.3239957
H    -0.6537645    5.5775887    1.4056045
H     1.0772932    5.5731613    1.0045994
H     0.4683004    4.5576113    2.3276609
C    -0.4675026    4.7037696   -1.5449642
H    -0.4554234    4.1680673   -2.5015258
H     0.2800267    5.5113790   -1.6083168
H    -1.4552677    5.1776092   -1.4229662
C     0.3308958   -1.5457119    1.0992886
H     0.4510639   -0.6219900    1.7648954
C    -0.1919268   -2.0918885   -0.8754939
H    -1.1258050   -2.5061133   -0.4827376
C    -0.3400220   -1.0223812   -1.8148286
H     0.4490894   -0.9246252   -2.5669000
H    -1.3544281   -0.8134202   -2.1698426
Zr    0.0011736    0.4110762   -0.0521826
H     1.3074659   -2.0391634    1.1312058
C     0.9263145   -3.0872487   -1.0633346
H     1.0486440   -3.7693777   -0.2122230
H     0.6741456   -3.6930543   -1.9482620
H     1.8889256   -2.5864685   -1.2556564
H    -0.4308648   -2.1544298    1.6026467
C    -1.0811466    1.9515935    2.9577380
H    -0.4855914    1.1628415    3.4424999
H    -0.5125823    2.8854698    2.9874603
H    -1.9856106    2.1008602    3.5670214
C     1.1623669    1.9865444   -2.9153414
H     1.5385522    2.9741438   -3.2187426
H     1.5757606    1.2398976   -3.6072252
H     0.0694544    1.9900802   -3.0489223
C    -4.0020562   -1.7356822   -0.1994393
C    -3.7200095   -2.9677528   -0.8173641
C    -4.8254937   -1.7019184    0.9467094
C    -4.1929040   -4.1673558   -0.2900263
H    -3.1143257   -2.9697222   -1.7289766
C    -5.2917895   -2.9211919    1.4607482
C    -4.9755719   -4.1416309    0.8664691
H    -3.9602997   -5.1129453   -0.7824399
H    -5.9414462   -2.9027667    2.3397492
H    -5.3592588   -5.0701907    1.2927588
C     4.0132403   -1.5776221    0.4930607
C     3.7651834   -2.8142460    1.1201713
C     4.8620590   -1.5340288   -0.6354633
C     4.2681831   -4.0059899    0.6055943
H     3.1515400   -2.8305083    2.0255554
C     5.3468053   -2.7480193   -1.1469307
C     5.0453684   -3.9729947   -0.5548188
H     4.0561299   -4.9523607    1.1058754
H     6.0055790   -2.7196256   -2.0190229
H     5.4426253   -4.8964002   -0.9798702
C     5.3492944   -0.2463688   -1.2557024
H     4.9179326   -0.0764143   -2.2548253
H     5.1209318    0.6297464   -0.6350458
H     6.4403635   -0.2910489   -1.3856074
C    -5.2789822   -0.4145363    1.5904775
H    -4.6931950   -0.1742043    2.4922803
H    -5.1989763    0.4404937    0.9051721
H    -6.3283147   -0.5006948    1.9059913
